# Supplementary material for: Zinc proteomes, phylogenetics and evolution
Source: Royal Society of Chemistry journal article supplement (doi:10.1039/c0mt00024h), 2010-01-01
Supplement: c0mt00024h.pdf [file c0mt00024h.pdf]

**Table S1** – The starting data set, which consists of 271 proposed Zn-binding Pfam domains, some of them with one or more metal binding pattern (MBP) associated. In the zinc fingers the zinc ion is bound by a combination of four residues of His or Cys in a tetrahedral geometry. The hydrolytic enzymes have zinc coordinated by three residues among His, Glu, Asp and Arg with one or two water molecules.

| Pfam domain     | Associated pattern(s)                                                                                                                                                                                                                                                                                                                                 |
|-----------------|-------------------------------------------------------------------------------------------------------------------------------------------------------------------------------------------------------------------------------------------------------------------------------------------------------------------------------------------------------|
| 3_5_exonuc      | 'DX(1)EX(124)D', 'DX(1)EX(131)D', 'DX(1)EX(143)D', 'DX(56)D'                                                                                                                                                                                                                                                                                          |
| 5_3_exonuc_N    | 'DX(22)D'                                                                                                                                                                                                                                                                                                                                             |
| 5_nucleotid_C   | No pattern                                                                                                                                                                                                                                                                                                                                            |
| AAL_decarboxy   | 'HX(1)HX(10)H'                                                                                                                                                                                                                                                                                                                                        |
| ADH_N           | 'CX(0)T', 'CX(2)CX(2)CX(7)C', 'CX(2)CX(2)CX(8)C', 'CX(20)H', 'CX(20)HX(0)E', 'CX(21)H', 'CX(21)HX(0)E', 'CX(22)H', 'CX(23)H', 'CX(24)H', 'CX(24)HX(0)E', 'CX(26)HX(0)E', 'CX(29)H', 'CX(29)HX(0)E', 'CX(95)H', 'DX(1)H', 'DX(2)CX(2)CX(7)C', 'EX(2)CX(2)CX(7)C'                                                                                       |
| ADH_zinc_N      | 'DX(1)H'                                                                                                                                                                                                                                                                                                                                              |
| ADK_lid         | 'CX(16)CX(2)D', 'CX(2)CX(16)CX(2)C', 'CX(2)CX(16)CX(2)D'                                                                                                                                                                                                                                                                                              |
| ALAD            | 'CX(1)C', 'CX(1)CX(7)C', 'CX(1)DX(7)C', 'CX(7)CX(36)D', 'DX(7)C', 'EX(43)H'                                                                                                                                                                                                                                                                           |
| APOBEC_C        | No pattern                                                                                                                                                                                                                                                                                                                                            |
| APOBEC_N        | 'EX(37)HX(29)CX(2)C', 'HX(29)CX(2)C', 'HX(30)CX(2)C'                                                                                                                                                                                                                                                                                                  |
| ATP-sulfurylase | 'CX(2)CX(8)CX(3)H'                                                                                                                                                                                                                                                                                                                                    |
| A_deamin        | 'HX(56)CX(64)C'                                                                                                                                                                                                                                                                                                                                       |
| A_deaminase     | 'HX(1)HX(196)HX(80)D', 'HX(1)HX(196)HX(80)E', 'HX(1)HX(277)D', 'HX(76)H', 'HX(83)H'                                                                                                                                                                                                                                                                   |
| Abhydrolase_2   | 'HX(25)DX(2)CX(27)H'                                                                                                                                                                                                                                                                                                                                  |
| Ada_Zn_binding  | 'CX(26)C', 'CX(26)CX(2)C', 'CX(3)CX(26)CX(2)C'                                                                                                                                                                                                                                                                                                        |
| Adenine_glyco   | 'CX(157)HX(3)H'                                                                                                                                                                                                                                                                                                                                       |
| Alk_phosphatase | 'DX(101)HX(1)TX(166)E', 'DX(103)TX(166)E', 'DX(111)HX(1)TX(158)E', 'DX(216)SX(0)D', 'DX(3)H', 'DX(3)HX(111)H', 'DX(3)HX(112)H', 'DX(3)HX(73)H', 'DX(3)HX(80)H', 'DX(317)DX(0)H', 'DX(42)H', 'DX(48)SX(269)DX(0)H', 'DX(49)SX(264)DX(0)H', 'DX(50)CX(266)DX(0)H', 'DX(50)SX(224)DX(41)DX(0)H', 'DX(50)SX(266)DX(0)H', 'DX(84)H', 'NX(50)SX(266)DX(0)H' |
| Alpha_kinase    | 'HX(56)HX(1)CX(3)C'                                                                                                                                                                                                                                                                                                                                   |
| Amidase_2       | 'HX(104)HX(7)C', 'HX(109)HX(7)C', 'HX(115)HX(9)D', 'HX(119)HX(9)D', 'HX(99)HX(7)C'                                                                                                                                                                                                                                                                    |
| Amidase_3       | 'HX(15)EX(53)H', 'HX(55)E'                                                                                                                                                                                                                                                                                                                            |
| Amidinotransf   | 'HX(100)C'                                                                                                                                                                                                                                                                                                                                            |
| Amidohydro_1    | 'CX(123)HX(29)H', 'DX(26)HX(58)H', 'DX(36)H', 'EX(3)E', 'EX(63)HX(20)H', 'HX(1)HX(142)HX(78)D', 'HX(1)HX(152)HX(91)D', 'HX(1)HX(154)HX(85)D', 'HX(1)HX(166)HX(74)D', 'HX(1)HX(169)HX(36)HX(50)D', 'HX(1)HX(209)D', 'HX(1)HX(214)D', 'HX(1)HX(214)N', 'HX(1)HX(231)D', 'HX(1)HX(249)D', 'HX(1)HX(253)D', 'HX(1)HX(254)D',                              |

|                |                                                                                                                                                                                                                                                                                                                                                                                                                                               |
|----------------|-----------------------------------------------------------------------------------------------------------------------------------------------------------------------------------------------------------------------------------------------------------------------------------------------------------------------------------------------------------------------------------------------------------------------------------------------|
|                | 'HX(1)HX(256)D', 'HX(1)HX(258)D', 'HX(1)HX(26)C', 'HX(1)HX(293)D', 'HX(1)HX(89)DX(158)D', 'HX(19)H', 'HX(214)D', 'HX(22)H', 'HX(231)H', 'HX(269)H', 'HX(27)H', 'HX(28)H', 'HX(37)H', 'HX(39)E', 'HX(55)H', 'HX(57)H', 'HX(89)H', 'KX(32)HX(55)H', 'QX(1)HX(247)D'                                                                                                                                                                             |
| Amidohydro_2   | 'DX(26)HX(3)H', 'EX(122)H', 'EX(28)HX(28)H', 'EX(35)HX(23)H', 'HX(1)HX(110)EX(105)D', 'HX(1)HX(165)HX(116)D', 'HX(1)HX(169)HX(105)E', 'HX(1)HX(85)EX(109)D', 'HX(35)H'                                                                                                                                                                                                                                                                        |
| Amidohydro_3   | 'CX(123)HX(29)H', 'DX(26)HX(58)H', 'DX(36)H', 'EX(3)E', 'HX(1)HX(142)HX(78)D', 'HX(1)HX(152)HX(91)D', 'HX(1)HX(154)HX(85)D', 'HX(1)HX(166)HX(74)D', 'HX(1)HX(169)HX(36)HX(50)D', 'HX(1)HX(214)D', 'HX(1)HX(214)N', 'HX(1)HX(249)D', 'HX(1)HX(253)D', 'HX(1)HX(254)D', 'HX(1)HX(256)D', 'HX(1)HX(258)D', 'HX(1)HX(26)C', 'HX(1)HX(89)DX(158)D', 'HX(19)H', 'HX(214)D', 'HX(269)H', 'HX(27)H', 'HX(28)H', 'HX(39)E', 'HX(55)H', 'KX(32)HX(55)H' |
| Asp            | 'DX(181)D', 'HX(25)DX(63)D', 'HX(5)HX(141)DX(3)D'                                                                                                                                                                                                                                                                                                                                                                                             |
| AstE_AspA      | 'HX(2)E', 'HX(2)EX(88)H', 'HX(2)EX(89)H', 'HX(2)EX(91)H'                                                                                                                                                                                                                                                                                                                                                                                      |
| Astacin        | 'HX(3)HX(5)H', 'HX(3)HX(5)HX(46)Y'                                                                                                                                                                                                                                                                                                                                                                                                            |
| Beta-lactamase | No pattern                                                                                                                                                                                                                                                                                                                                                                                                                                    |
| COX2_TM        | 'HX(3)H'                                                                                                                                                                                                                                                                                                                                                                                                                                      |
| COX3           | 'HX(83)HX(3)E'                                                                                                                                                                                                                                                                                                                                                                                                                                |
| COX5B          | 'CX(1)CX(19)CX(2)C', 'CX(7)HX(14)CX(2)C', 'DX(7)E'                                                                                                                                                                                                                                                                                                                                                                                            |
| COX7C          | 'HX(2)E'                                                                                                                                                                                                                                                                                                                                                                                                                                      |
| Carb_anhydrase | 'CX(1)HX(22)H', 'DX(1)HX(22)H', 'HX(1)H', 'HX(1)HX(16)H', 'HX(1)HX(17)H', 'HX(1)HX(22)C', 'HX(1)HX(22)D', 'HX(1)HX(22)H', 'HX(1)HX(22)HX(79)C', 'HX(1)HX(22)HX(79)D', 'HX(1)HX(22)HX(79)E', 'HX(1)HX(22)N', 'HX(1)HX(22)Q', 'HX(2)RX(132)H', 'HX(22)H', 'HX(24)H', 'NX(1)H', 'NX(1)HX(22)H', 'QX(68)C'                                                                                                                                        |
| D-aminoacyl_C  | No pattern                                                                                                                                                                                                                                                                                                                                                                                                                                    |
| DFF40          | 'CX(8)CX(3)HX(64)C'                                                                                                                                                                                                                                                                                                                                                                                                                           |
| DHH            | 'DX(61)DX(21)H', 'HX(3)DX(63)D'                                                                                                                                                                                                                                                                                                                                                                                                               |
| DHQ_synthase   | 'DX(3)HX(62)HX(13)H', 'DX(78)HX(15)H', 'DX(82)HX(16)H', 'DX(82)HX(17)H', 'EX(2)H', 'EX(63)HX(13)H', 'EX(76)HX(15)H', 'EX(77)H'                                                                                                                                                                                                                                                                                                                |
| DNA_ligase_A_M | 'DX(129)E'                                                                                                                                                                                                                                                                                                                                                                                                                                    |
| DNA_ligase_ZBD | 'CX(2)CX(12)CX(4)C', 'CX(2)CX(14)CX(5)C'                                                                                                                                                                                                                                                                                                                                                                                                      |
| DNA_pol_A      | 'EX(171)D', 'HX(3)E'                                                                                                                                                                                                                                                                                                                                                                                                                          |
| DOPA_dioxygen  | 'HX(69)H'                                                                                                                                                                                                                                                                                                                                                                                                                                     |
| DUF1907        | 'HX(1)HX(9)H'                                                                                                                                                                                                                                                                                                                                                                                                                                 |
| DUF258         | 'CX(1)HX(5)C', 'CX(4)CX(1)HX(5)C'                                                                                                                                                                                                                                                                                                                                                                                                             |
| Endonuclease_7 | 'CX(2)CX(31)CX(2)C'                                                                                                                                                                                                                                                                                                                                                                                                                           |
| FTP            | No pattern                                                                                                                                                                                                                                                                                                                                                                                                                                    |
| F_bp_aldolase  | 'DX(29)EX(6)E', 'DX(62)EX(91)HX(19)K', 'HX(115)HX(37)H', 'HX(37)H', 'HX(63)EX(51)HX(37)H', 'HX(93)HX(31)H', 'HX(96)HX(27)H'                                                                                                                                                                                                                                                                                                                   |
| Fe-ADH         | 'DX(3)HX(62)HX(13)H', 'DX(3)HX(68)HX(13)H', 'DX(78)HX(15)H', 'DX(82)HX(16)H',                                                                                                                                                                                                                                                                                                                                                                 |

|                 |                                                                                                                                                                                                                                                                                                                                                                                                                                                                                                                                                                                                                                                                                                                                                                                                                                                                                                                                                                |
|-----------------|----------------------------------------------------------------------------------------------------------------------------------------------------------------------------------------------------------------------------------------------------------------------------------------------------------------------------------------------------------------------------------------------------------------------------------------------------------------------------------------------------------------------------------------------------------------------------------------------------------------------------------------------------------------------------------------------------------------------------------------------------------------------------------------------------------------------------------------------------------------------------------------------------------------------------------------------------------------|
|                 | 'DX(82)HX(17)H', 'EX(2)H'                                                                                                                                                                                                                                                                                                                                                                                                                                                                                                                                                                                                                                                                                                                                                                                                                                                                                                                                      |
| Flavi_NS5       | 'EX(3)HX(4)CX(2)C', 'HX(1)HX(13)CX(118)C', 'HX(15)CX(118)C'                                                                                                                                                                                                                                                                                                                                                                                                                                                                                                                                                                                                                                                                                                                                                                                                                                                                                                    |
| Flavodoxin_2    | 'HX(3)H', 'HX(3)HX(44)C'                                                                                                                                                                                                                                                                                                                                                                                                                                                                                                                                                                                                                                                                                                                                                                                                                                                                                                                                       |
| FmdA_AmdA       | 'DX(1)HX(13)E', 'NX(1)DX(24)D'                                                                                                                                                                                                                                                                                                                                                                                                                                                                                                                                                                                                                                                                                                                                                                                                                                                                                                                                 |
| GDPD            | 'EX(1)DX(79)E'                                                                                                                                                                                                                                                                                                                                                                                                                                                                                                                                                                                                                                                                                                                                                                                                                                                                                                                                                 |
| GFA             | 'CX(1)CX(2)C', 'CX(2)C'                                                                                                                                                                                                                                                                                                                                                                                                                                                                                                                                                                                                                                                                                                                                                                                                                                                                                                                                        |
| GPI             | 'DX(0)E', 'HX(1)HX(6)EX(38)H'                                                                                                                                                                                                                                                                                                                                                                                                                                                                                                                                                                                                                                                                                                                                                                                                                                                                                                                                  |
| GTP_EFTU        | 'CX(2)CX(8)CX(2)C'                                                                                                                                                                                                                                                                                                                                                                                                                                                                                                                                                                                                                                                                                                                                                                                                                                                                                                                                             |
| GTP_cyclohydro2 | 'CX(10)CX(1)C'                                                                                                                                                                                                                                                                                                                                                                                                                                                                                                                                                                                                                                                                                                                                                                                                                                                                                                                                                 |
| GTP_cyclohydrol | 'CX(2)HX(67)C'                                                                                                                                                                                                                                                                                                                                                                                                                                                                                                                                                                                                                                                                                                                                                                                                                                                                                                                                                 |
| GalP_UDP_tr_C   | 'CX(54)C', 'CX(54)H'                                                                                                                                                                                                                                                                                                                                                                                                                                                                                                                                                                                                                                                                                                                                                                                                                                                                                                                                           |
| GalP_UDP_transf | 'CX(2)CX(59)HX(48)H'                                                                                                                                                                                                                                                                                                                                                                                                                                                                                                                                                                                                                                                                                                                                                                                                                                                                                                                                           |
| GatB_N          | 'CX(1)CX(50)CX(2)E'                                                                                                                                                                                                                                                                                                                                                                                                                                                                                                                                                                                                                                                                                                                                                                                                                                                                                                                                            |
| Glyco_hydro_26  | 'EX(3)H', 'HX(31)DX(9)E', 'RX(2)HX(0)EX(70)DX(36)E', 'RX(2)HX(71)DX(36)E'                                                                                                                                                                                                                                                                                                                                                                                                                                                                                                                                                                                                                                                                                                                                                                                                                                                                                      |
| Glyco_hydro_38  | 'HX(1)DX(111)D', 'HX(1)DX(121)D'                                                                                                                                                                                                                                                                                                                                                                                                                                                                                                                                                                                                                                                                                                                                                                                                                                                                                                                               |
| Glyoxalase      | 'EX(65)E', 'HX(45)E', 'HX(45)Q', 'HX(46)EX(22)HX(48)E', 'HX(47)E', 'HX(47)H', 'HX(50)E',<br>'QX(65)E'                                                                                                                                                                                                                                                                                                                                                                                                                                                                                                                                                                                                                                                                                                                                                                                                                                                          |
| Guanylate_cyc   | 'DX(43)D'                                                                                                                                                                                                                                                                                                                                                                                                                                                                                                                                                                                                                                                                                                                                                                                                                                                                                                                                                      |
| HCV_NS5a_1a     | 'CX(17)CX(1)CX(20)C'                                                                                                                                                                                                                                                                                                                                                                                                                                                                                                                                                                                                                                                                                                                                                                                                                                                                                                                                           |
| Hist_deacetyl   | 'DX(1)HX(85)D', 'DX(1)HX(86)D', 'DX(1)HX(87)D', 'DX(1)HX(91)D'                                                                                                                                                                                                                                                                                                                                                                                                                                                                                                                                                                                                                                                                                                                                                                                                                                                                                                 |
| Histidinol_dh   | 'HX(97)D', 'QX(2)HX(97)D'                                                                                                                                                                                                                                                                                                                                                                                                                                                                                                                                                                                                                                                                                                                                                                                                                                                                                                                                      |
| HtpX_N          | No pattern                                                                                                                                                                                                                                                                                                                                                                                                                                                                                                                                                                                                                                                                                                                                                                                                                                                                                                                                                     |
| Hycl            | No pattern                                                                                                                                                                                                                                                                                                                                                                                                                                                                                                                                                                                                                                                                                                                                                                                                                                                                                                                                                     |
| IPT             | 'DX(39)EX(0)H'                                                                                                                                                                                                                                                                                                                                                                                                                                                                                                                                                                                                                                                                                                                                                                                                                                                                                                                                                 |
| Iso_dh          | 'DX(3)D', 'HX(1)E', 'HX(4)G'                                                                                                                                                                                                                                                                                                                                                                                                                                                                                                                                                                                                                                                                                                                                                                                                                                                                                                                                   |
| Kdul            | 'HX(1)HX(4)EX(41)H'                                                                                                                                                                                                                                                                                                                                                                                                                                                                                                                                                                                                                                                                                                                                                                                                                                                                                                                                            |
| Lactamase_B     | 'CX(0)H', 'DX(0)H', 'DX(0)HX(102)D', 'DX(0)HX(102)DX(46)H', 'DX(0)HX(112)DX(25)H',<br>'DX(0)HX(124)EX(44)H', 'DX(0)HX(135)H', 'DX(0)HX(136)DX(53)H', 'DX(0)HX(142)D',<br>'DX(0)HX(142)DX(57)H', 'DX(0)HX(74)DX(38)H', 'DX(0)HX(76)D', 'DX(0)HX(81)DX(43)H',<br>'DX(0)HX(82)DX(45)H', 'DX(0)HX(90)DX(55)H', 'DX(0)HX(91)D', 'DX(0)HX(97)D',<br>'DX(0)RX(99)C', 'DX(100)C', 'DX(76)CX(38)H', 'DX(77)CX(41)H', 'DX(79)CX(41)H',<br>'EX(13)HX(56)K', 'EX(76)CX(38)H', 'HX(1)HX(100)D', 'HX(1)HX(108)EX(18)E', 'HX(1)HX(127)E',<br>'HX(1)HX(53)HX(23)D', 'HX(1)HX(55)HX(18)D', 'HX(1)HX(59)H', 'HX(1)HX(60)H',<br>'HX(1)HX(60)HX(24)D', 'HX(1)HX(62)H', 'HX(1)HX(62)HX(21)D', 'HX(1)HX(72)HX(20)D',<br>'HX(1)HX(72)HX(21)D', 'HX(1)HX(73)H', 'HX(1)HX(74)HX(70)D', 'HX(1)HX(77)H',<br>'HX(1)HX(77)HX(21)D', 'HX(1)HX(79)H', 'HX(1)HX(79)HX(20)D', 'HX(1)HX(83)HX(55)D',<br>'HX(1)HX(84)HX(20)D', 'HX(1)HX(95)NX(19)D', 'HX(164)E', 'HX(74)HX(70)D', 'HX(96)DX(45)H' |
| Ldh_1_C         | 'DX(41)KX(8)E'                                                                                                                                                                                                                                                                                                                                                                                                                                                                                                                                                                                                                                                                                                                                                                                                                                                                                                                                                 |
| Ldh_1_N         | 'DX(2)E', 'NX(1)C'                                                                                                                                                                                                                                                                                                                                                                                                                                                                                                                                                                                                                                                                                                                                                                                                                                                                                                                                             |

|                 |                                                                                                                                                                                                                                                                                                 |
|-----------------|-------------------------------------------------------------------------------------------------------------------------------------------------------------------------------------------------------------------------------------------------------------------------------------------------|
| LigB            | 'HX(176)H'                                                                                                                                                                                                                                                                                      |
| Metallophos     | 'DX(1)HX(39)DX(146)H', 'DX(1)HX(40)DX(169)Q', 'DX(1)QX(44)DX(206)H', 'DX(169)H',<br>'DX(29)NX(75)HX(38)H', 'DX(31)NX(100)HX(34)H', 'DX(31)NX(122)H', 'DX(31)NX(48)HX(81)H',<br>'DX(33)NX(102)HX(31)H', 'DX(35)NX(131)HX(36)H', 'DX(35)NX(31)HX(21)H',<br>'DX(36)NX(84)HX(36)H', 'HX(8)E'        |
| Metallothio     | 'CX(3)CX(4)CX(4)C', 'CX(5)CX(1)CX(10)C'                                                                                                                                                                                                                                                         |
| Metallothio_5   | No pattern                                                                                                                                                                                                                                                                                      |
| Metallothio_PEC | No pattern                                                                                                                                                                                                                                                                                      |
| Metallothio_Pro | 'CX(15)CX(14)CX(1)H', 'CX(24)CX(3)HX(13)C', 'CX(32)CX(4)CX(1)C', 'CX(4)CX(17)CX(3)C'                                                                                                                                                                                                            |
| Metallothionein | No pattern                                                                                                                                                                                                                                                                                      |
| Meth_synt_1     | No pattern                                                                                                                                                                                                                                                                                      |
| Meth_synt_2     | 'HX(1)CX(21)EX(61)C', 'HX(1)CX(83)C', 'HX(3)D'                                                                                                                                                                                                                                                  |
| Methyltransf_1N | 'CX(4)CX(55)H'                                                                                                                                                                                                                                                                                  |
| Monooxygenase_B | 'DX(1)D'                                                                                                                                                                                                                                                                                        |
| NAD_binding_1   | 'EX(34)H'                                                                                                                                                                                                                                                                                       |
| NUDIX-like      | 'CX(2)C'                                                                                                                                                                                                                                                                                        |
| OMPdecase       | 'HX(1)DX(30)HX(108)D'                                                                                                                                                                                                                                                                           |
| PADR1           | 'CX(2)CX(12)CX(9)C'                                                                                                                                                                                                                                                                             |
| PARP            | 'CX(2)HX(4)CX(2)C'                                                                                                                                                                                                                                                                              |
| PDEase_I        | 'HX(0)HX(108)D', 'HX(0)HX(109)D', 'HX(0)HX(112)D', 'HX(0)HX(116)D', 'HX(110)H',<br>'HX(33)HX(0)DX(109)D', 'HX(33)HX(0)NX(109)D', 'HX(35)HX(0)D', 'HX(35)HX(0)DX(105)D',<br>'HX(35)HX(0)DX(108)D', 'HX(35)HX(0)DX(109)D', 'HX(35)HX(0)DX(110)D',<br>'HX(35)HX(0)DX(116)D', 'HX(35)HX(0)NX(116)D' |
| PMI_typel       | 'HX(17)EX(56)H', 'QX(1)HX(24)EX(146)H'                                                                                                                                                                                                                                                          |
| PTE             | 'DX(20)H', 'EX(32)HX(27)H', 'EX(74)H', 'HX(1)HX(110)EX(117)D', 'HX(1)HX(243)D', 'HX(22)D',<br>'HX(28)H', 'RX(28)DX(1)S'                                                                                                                                                                         |
| PTPS            | 'HX(1)H', 'HX(1)HX(76)H', 'HX(24)HX(1)H'                                                                                                                                                                                                                                                        |
| PdxA            | 'HX(99)H'                                                                                                                                                                                                                                                                                       |
| Pep_deformylase | No pattern                                                                                                                                                                                                                                                                                      |
| Peptidase_A25   | No pattern                                                                                                                                                                                                                                                                                      |
| Peptidase_C2    | No pattern                                                                                                                                                                                                                                                                                      |
| Peptidase_C78   | No pattern                                                                                                                                                                                                                                                                                      |
| Peptidase_M1    | 'HX(3)HX(18)E'                                                                                                                                                                                                                                                                                  |
| Peptidase_M10   | 'CX(3)HX(5)H', 'HX(0)KX(2)HX(5)H', 'HX(1)DX(12)H', 'HX(1)DX(12)HX(12)H', 'HX(14)HX(12)H',<br>'HX(3)HX(5)H', 'HX(3)HX(5)HX(29)Y', 'HX(3)HX(5)HX(7)M'                                                                                                                                             |
| Peptidase_M11   | No pattern                                                                                                                                                                                                                                                                                      |
| Peptidase_M13   | 'HX(3)HX(58)E'                                                                                                                                                                                                                                                                                  |
| Peptidase_M13_N | No pattern                                                                                                                                                                                                                                                                                      |
| Peptidase_M14   | 'EX(205)E', 'HX(2)EX(103)H', 'HX(2)EX(123)H', 'HX(2)EX(124)H', 'HX(2)EX(131)H'                                                                                                                                                                                                                  |

|                 |                                                                                                                                                                                                                                                                                                                                                                                                                                                              |
|-----------------|--------------------------------------------------------------------------------------------------------------------------------------------------------------------------------------------------------------------------------------------------------------------------------------------------------------------------------------------------------------------------------------------------------------------------------------------------------------|
| Peptidase_M15   | 'HX(6)DX(60)H'                                                                                                                                                                                                                                                                                                                                                                                                                                               |
| Peptidase_M15_3 | 'HX(6)DX(35)H'                                                                                                                                                                                                                                                                                                                                                                                                                                               |
| Peptidase_M16   | 'HX(3)HX(75)E', 'HX(3)HX(76)E'                                                                                                                                                                                                                                                                                                                                                                                                                               |
| Peptidase_M16_C | No pattern                                                                                                                                                                                                                                                                                                                                                                                                                                                   |
| Peptidase_M17   | 'DX(76)DX(1)E', 'KX(4)DX(17)DX(60)E', 'LX(0)MX(1)TX(97)R'                                                                                                                                                                                                                                                                                                                                                                                                    |
| Peptidase_M18   | 'DX(32)EX(108)H', 'HX(103)DX(54)D'                                                                                                                                                                                                                                                                                                                                                                                                                           |
| Peptidase_M19   | 'EX(69)HX(20)H', 'EX(72)HX(20)H', 'HX(1)DX(102)E'                                                                                                                                                                                                                                                                                                                                                                                                            |
| Peptidase_M2    | 'HX(3)HX(23)E'                                                                                                                                                                                                                                                                                                                                                                                                                                               |
| Peptidase_M20   | 'DX(260)E', 'DX(3)D', 'DX(30)EX(109)H', 'DX(30)EX(311)H', 'DX(32)EX(108)H',<br>'DX(32)EX(97)H', 'DX(33)EX(204)H', 'DX(34)E', 'DX(34)EX(103)H', 'DX(34)EX(208)H',<br>'DX(34)EX(254)H', 'DX(34)EX(277)H', 'DX(34)EX(284)H', 'HX(10)DX(97)H', 'HX(11)DX(60)D',<br>'HX(11)DX(62)D', 'HX(19)DX(0)DX(60)D', 'HX(19)DX(33)EX(27)D', 'HX(19)DX(61)D',<br>'HX(28)DX(58)E', 'HX(31)DX(57)D', 'HX(32)DX(62)D', 'HX(52)D', 'HX(53)D', 'HX(54)D',<br>'HX(55)D', 'HX(61)D' |
| Peptidase_M22   | No pattern                                                                                                                                                                                                                                                                                                                                                                                                                                                   |
| Peptidase_M23   | 'HX(1)D', 'HX(3)DX(78)H', 'HX(76)D', 'HX(78)D'                                                                                                                                                                                                                                                                                                                                                                                                               |
| Peptidase_M24   | No pattern                                                                                                                                                                                                                                                                                                                                                                                                                                                   |
| Peptidase_M26_C | No pattern                                                                                                                                                                                                                                                                                                                                                                                                                                                   |
| Peptidase_M26_N | No pattern                                                                                                                                                                                                                                                                                                                                                                                                                                                   |
| Peptidase_M27   | 'DX(172)H', 'HX(3)H', 'HX(3)HX(33)E', 'HX(3)HX(34)E', 'HX(3)HX(35)E', 'HX(38)E'                                                                                                                                                                                                                                                                                                                                                                              |
| Peptidase_M28   | 'DX(3)D', 'DX(32)EX(97)H', 'DX(34)EX(103)H', 'DX(34)EX(114)H', 'DX(34)EX(208)H',<br>'DX(37)EX(127)H', 'DX(42)EX(127)H', 'HX(11)DX(60)D', 'HX(11)DX(62)D',<br>'HX(19)DX(0)DX(60)D', 'HX(19)DX(33)EX(27)D', 'HX(19)DX(61)D', 'HX(28)DX(58)E',<br>'HX(36)DX(28)E', 'HX(65)D', 'HX(9)DX(65)D'                                                                                                                                                                    |
| Peptidase_M29   | No pattern                                                                                                                                                                                                                                                                                                                                                                                                                                                   |
| Peptidase_M3    | 'DX(1)H', 'HX(3)H', 'HX(3)HX(23)E', 'HX(3)HX(24)E'                                                                                                                                                                                                                                                                                                                                                                                                           |
| Peptidase_M30   | No pattern                                                                                                                                                                                                                                                                                                                                                                                                                                                   |
| Peptidase_M32   | 'HX(3)HX(25)E'                                                                                                                                                                                                                                                                                                                                                                                                                                               |
| Peptidase_M35   | 'HX(3)HX(10)D'                                                                                                                                                                                                                                                                                                                                                                                                                                               |
| Peptidase_M36   | No pattern                                                                                                                                                                                                                                                                                                                                                                                                                                                   |
| Peptidase_M3_N  | No pattern                                                                                                                                                                                                                                                                                                                                                                                                                                                   |
| Peptidase_M4    | 'HX(3)H'                                                                                                                                                                                                                                                                                                                                                                                                                                                     |
| Peptidase_M41   | 'HX(3)HX(72)D'                                                                                                                                                                                                                                                                                                                                                                                                                                               |
| Peptidase_M42   | 'DX(30)EX(109)H', 'DX(32)EX(108)H', 'HX(103)DX(54)D', 'HX(113)DX(52)D', 'HX(113)DX(54)D'                                                                                                                                                                                                                                                                                                                                                                     |
| Peptidase_M43   | No pattern                                                                                                                                                                                                                                                                                                                                                                                                                                                   |
| Peptidase_M44   | No pattern                                                                                                                                                                                                                                                                                                                                                                                                                                                   |
| Peptidase_M48   | 'HX(3)HX(51)EX(45)H'                                                                                                                                                                                                                                                                                                                                                                                                                                         |
| Peptidase_M49   | 'HX(4)HX(51)E'                                                                                                                                                                                                                                                                                                                                                                                                                                               |
| Peptidase_M4_C  | 'YX(8)EX(64)H'                                                                                                                                                                                                                                                                                                                                                                                                                                               |

|                 |                                                                                                                                                                                                                                                                                                                                          |
|-----------------|------------------------------------------------------------------------------------------------------------------------------------------------------------------------------------------------------------------------------------------------------------------------------------------------------------------------------------------|
| Peptidase_M50   | 'HX(3)HX(89)D'                                                                                                                                                                                                                                                                                                                           |
| Peptidase_M54   | No pattern                                                                                                                                                                                                                                                                                                                               |
| Peptidase_M55   | 'DX(1)EX(49)H', 'DX(95)HX(28)E'                                                                                                                                                                                                                                                                                                          |
| Peptidase_M56   | No pattern                                                                                                                                                                                                                                                                                                                               |
| Peptidase_M6    | No pattern                                                                                                                                                                                                                                                                                                                               |
| Peptidase_M61   | No pattern                                                                                                                                                                                                                                                                                                                               |
| Peptidase_M7    | 'HX(3)HX(5)D'                                                                                                                                                                                                                                                                                                                            |
| Peptidase_M74   | 'DX(2)H', 'HX(2)HX(6)DX(90)H'                                                                                                                                                                                                                                                                                                            |
| Peptidase_M8    | 'HX(3)HX(65)H'                                                                                                                                                                                                                                                                                                                           |
| Peptidase_M9    | No pattern                                                                                                                                                                                                                                                                                                                               |
| Peptidase_M9_N  | No pattern                                                                                                                                                                                                                                                                                                                               |
| Peptidase_S29   | 'CX(0)TX(0)CX(45)C', 'CX(0)TX(46)C', 'CX(1)CX(45)C', 'CX(47)C'                                                                                                                                                                                                                                                                           |
| PhnA_Zn_Ribbon  | No pattern                                                                                                                                                                                                                                                                                                                               |
| Phosphodiect    | 'DX(3)HX(148)H', 'DX(3)HX(161)H', 'DX(35)TX(166)DX(0)H', 'DX(38)TX(176)DX(0)H'                                                                                                                                                                                                                                                           |
| Pico_P2A        | 'CX(1)CX(57)CX(1)H'                                                                                                                                                                                                                                                                                                                      |
| Pkinase_Tyr     | 'CX(11)CX(2)C', 'CX(3)CX(7)CX(2)C'                                                                                                                                                                                                                                                                                                       |
| Polysacc_deac_1 | 'DX(3)H', 'DX(48)HX(3)H', 'DX(49)HX(3)H', 'HX(3)H'                                                                                                                                                                                                                                                                                       |
| Pre-SET         | 'CX(1)CX(2)CX(4)C', 'CX(1)CX(3)CX(4)C', 'CX(1)CX(4)CX(4)C', 'CX(1)CX(5)CX(4)C',<br>'CX(1)CX(5)CX(7)C', 'CX(10)CX(26)CX(3)C', 'CX(12)CX(29)CX(3)C', 'CX(13)CX(28)CX(3)C',<br>'CX(14)CX(46)CX(3)C', 'CX(17)CX(28)CX(3)C', 'CX(32)CX(5)CX(3)C', 'CX(35)CX(5)CX(3)C',<br>'CX(36)CX(5)CX(3)C', 'CX(38)CX(5)CX(3)C', 'CX(53)CX(5)CX(3)C'       |
| ProRS-C_1       | 'CX(2)C', 'CX(4)CX(25)CX(2)C'                                                                                                                                                                                                                                                                                                            |
| ProRS-C_2       | No pattern                                                                                                                                                                                                                                                                                                                               |
| Pro_CA          | 'CX(1)DX(50)HX(2)C', 'CX(1)DX(53)HX(2)C', 'CX(52)HX(2)C', 'CX(54)HX(2)C', 'CX(59)HX(2)C'                                                                                                                                                                                                                                                 |
| PseudoU_synth_1 | No pattern                                                                                                                                                                                                                                                                                                                               |
| Put_Phosphatase | 'CX(3)CX(3)CX(2)C'                                                                                                                                                                                                                                                                                                                       |
| QRPTase_C       | 'HX(30)DX(25)D', 'HX(56)D'                                                                                                                                                                                                                                                                                                               |
| RNA_POL_M_15KD  | 'CX(0)RX(1)C', 'CX(18)CX(2)C', 'CX(2)CX(18)C', 'CX(2)CX(18)CX(2)C'                                                                                                                                                                                                                                                                       |
| RNA_pol_A_bac   | 'CX(1)CX(3)C', 'CX(1)CX(3)CX(2)C'                                                                                                                                                                                                                                                                                                        |
| RNA_pol_L       | 'CX(1)CX(3)C', 'CX(1)CX(3)CX(2)C'                                                                                                                                                                                                                                                                                                        |
| RNA_pol_N       | 'CX(2)CX(33)CX(0)C', 'CX(2)CX(34)CX(0)C', 'CX(33)CX(0)C'                                                                                                                                                                                                                                                                                 |
| RNA_pol_Rpb1_1  | 'AX(16)C', 'CX(0)MX(1)CX(37)CX(18)C', 'CX(0)QX(1)CX(6)CX(2)H', 'CX(1)CX(12)CX(2)C',<br>'CX(1)CX(15)C', 'CX(12)H', 'CX(18)C', 'CX(2)CX(37)CX(18)C', 'CX(2)CX(56)C', 'CX(2)CX(6)C',<br>'CX(2)CX(6)CX(2)H', 'CX(2)CX(9)H', 'CX(37)C', 'CX(37)CX(18)C', 'CX(4)NX(4)CX(2)H',<br>'CX(40)C', 'CX(56)C', 'CX(6)C', 'CX(6)CX(2)H', 'MX(1)CX(56)C' |
| RNA_pol_Rpb1_5  | 'CX(6)CX(2)C', 'CX(81)CX(6)C', 'CX(81)CX(6)CX(2)C'                                                                                                                                                                                                                                                                                       |
| RNA_pol_Rpb2_7  | 'CX(15)CX(2)C', 'CX(18)C', 'CX(2)CX(14)C', 'CX(2)CX(15)C', 'CX(2)CX(15)CX(2)C',<br>'CX(2)CX(18)C'                                                                                                                                                                                                                                        |
| RdRP_1          | 'HX(1)HX(8)C'                                                                                                                                                                                                                                                                                                                            |

|                 |                                                                                                                                                                                                                                     |
|-----------------|-------------------------------------------------------------------------------------------------------------------------------------------------------------------------------------------------------------------------------------|
| RdRP_4          | 'HX(1)HX(8)C'                                                                                                                                                                                                                       |
| Reprolysin      | 'DX(0)FX(45)N', 'DX(32)HX(3)HX(5)H', 'HX(3)HX(5)H'                                                                                                                                                                                  |
| RhaA            | 'EX(32)DX(26)HX(39)D', 'EX(34)DX(26)HX(45)D', 'HX(31)D'                                                                                                                                                                             |
| Ribosomal_L36   | 'CX(2)CX(12)CX(4)H', 'CX(2)CX(12)CX(5)H'                                                                                                                                                                                            |
| Ribosomal_L37ae | No pattern                                                                                                                                                                                                                          |
| Ribosomal_L37e  | No pattern                                                                                                                                                                                                                          |
| Ribosomal_L40e  | 'CX(2)CX(10)CX(2)C'                                                                                                                                                                                                                 |
| Ribosomal_S14   | 'CX(12)CX(2)C', 'CX(2)CX(12)CX(2)C', 'CX(2)CX(15)C', 'RX(0)CX(1)RX(13)C'                                                                                                                                                            |
| Ribosomal_S27   | No pattern                                                                                                                                                                                                                          |
| Ribosomal_S27e  | No pattern                                                                                                                                                                                                                          |
| Ribul_P_3_epim  | 'HX(1)DX(30)HX(108)D', 'HX(1)DX(31)HX(108)D'                                                                                                                                                                                        |
| S-methyl_trans  | 'CX(26)NX(37)CX(0)C', 'CX(64)CX(0)C', 'CX(81)CX(0)C', 'YX(56)CX(81)CX(0)C'                                                                                                                                                          |
| SelR            | 'CX(2)CX(45)CX(2)C'                                                                                                                                                                                                                 |
| SoxD            | 'CX(2)CX(49)HX(3)C'                                                                                                                                                                                                                 |
| Sulfatase       | 'CX(0)C'                                                                                                                                                                                                                            |
| TGT             | 'CX(1)CX(2)CX(22)H', 'CX(1)CX(2)CX(25)H'                                                                                                                                                                                            |
| TK              | 'CX(2)CX(28)CX(2)C', 'CX(2)CX(29)CX(2)C', 'CX(2)CX(34)CX(2)C', 'CX(2)CX(34)CX(2)H'                                                                                                                                                  |
| TRM13           | No pattern                                                                                                                                                                                                                          |
| TatD_DNase      | 'DX(26)HX(3)H', 'EX(35)HX(23)H', 'EX(35)HX(24)H', 'HX(1)HX(84)EX(110)D',<br>'HX(1)HX(85)EX(109)D'                                                                                                                                   |
| Toxin_trans     | No pattern                                                                                                                                                                                                                          |
| Trypsin         | 'HX(137)S', 'HX(143)S', 'HX(152)G', 'HX(152)GX(0)D', 'HX(2)H', 'HX(5)E', 'HX(51)E', 'HX(91)D'                                                                                                                                       |
| U-box           | 'CX(1)HX(22)CX(4)C'                                                                                                                                                                                                                 |
| UCH             | 'CX(2)CX(22)HX(7)H', 'CX(2)CX(25)CX(2)C', 'CX(2)CX(43)CX(2)C', 'CX(2)CX(45)CX(2)C',<br>'CX(2)CX(47)CX(2)C'                                                                                                                          |
| VanY            | 'HX(6)DX(45)H'                                                                                                                                                                                                                      |
| Viral_protease  | 'CX(2)CX(31)CX(1)C'                                                                                                                                                                                                                 |
| YgbB            | 'DX(1)H', 'DX(1)HX(31)H'                                                                                                                                                                                                            |
| Zn_peptidase    | No pattern                                                                                                                                                                                                                          |
| Zn_peptidase_2  | No pattern                                                                                                                                                                                                                          |
| dCMP_cyt_deam_1 | 'CX(29)CX(44)HX(7)E', 'CX(32)CX(2)C', 'CX(33)CX(2)C', 'CX(34)CX(2)C', 'CX(4)CX(6)H',<br>'CX(8)C', 'HX(24)CX(8)C', 'HX(26)CX(2)C', 'HX(27)CX(2)C', 'HX(27)CX(8)C', 'HX(28)CX(2)C',<br>'HX(29)CX(2)C', 'HX(32)CX(2)C', 'HX(34)CX(2)C' |
| dCMP_cyt_deam_2 | 'CX(32)CX(2)C', 'HX(32)CX(2)C'                                                                                                                                                                                                      |
| malic           | 'KX(41)EX(0)DX(24)D'                                                                                                                                                                                                                |
| tRNA-synt_1     | 'CX(2)C', 'CX(2)CX(13)CX(2)H', 'CX(2)CX(164)CX(2)C', 'CX(2)CX(204)CX(2)C',<br>'CX(2)CX(37)CX(1)C', 'CX(2)CX(41)CX(2)C', 'CX(2)CX(9)CX(2)C', 'CX(2)DX(42)CX(2)C',<br>'CX(20)CX(2)C', 'CX(40)CX(1)C', 'GX(36)C'                       |
| tRNA-synt_1c    | 'CX(1)CX(11)YX(3)C'                                                                                                                                                                                                                 |

|               |                                                                                                                                                                                                                                                                                                                                                                                                                                                                                                                                                                                                                                                               |
|---------------|---------------------------------------------------------------------------------------------------------------------------------------------------------------------------------------------------------------------------------------------------------------------------------------------------------------------------------------------------------------------------------------------------------------------------------------------------------------------------------------------------------------------------------------------------------------------------------------------------------------------------------------------------------------|
| tRNA-synt_1e  | 'CX(180)CX(24)H', 'CX(180)CX(24)HX(3)E'                                                                                                                                                                                                                                                                                                                                                                                                                                                                                                                                                                                                                       |
| tRNA-synt_1f  | 'CX(2)HX(18)C', 'DX(3)CX(0)HX(5)H'                                                                                                                                                                                                                                                                                                                                                                                                                                                                                                                                                                                                                            |
| tRNA-synt_1g  | 'CX(180)CX(24)H', 'CX(180)CX(24)HX(3)E', 'CX(2)C', 'CX(2)CX(13)CX(2)H',<br>'CX(2)CX(164)CX(2)C', 'CX(2)CX(204)CX(2)C', 'CX(2)CX(37)CX(1)C', 'CX(2)CX(41)CX(2)C',<br>'CX(2)CX(9)CX(2)C', 'CX(2)DX(42)CX(2)C', 'CX(20)CX(2)C', 'CX(40)CX(1)C', 'GX(36)C'                                                                                                                                                                                                                                                                                                                                                                                                        |
| tRNA-synt_2b  | 'CX(48)E', 'CX(50)H'                                                                                                                                                                                                                                                                                                                                                                                                                                                                                                                                                                                                                                          |
| tRNA-synt_2d  | 'CX(2)CX(4)CX(2)C'                                                                                                                                                                                                                                                                                                                                                                                                                                                                                                                                                                                                                                            |
| tRNA_SAD      | 'HX(3)H'                                                                                                                                                                                                                                                                                                                                                                                                                                                                                                                                                                                                                                                      |
| zf-4CXXC_R1   | No pattern                                                                                                                                                                                                                                                                                                                                                                                                                                                                                                                                                                                                                                                    |
| zf-A20        | 'CX(2)C', 'CX(4)CX(11)CX(2)C'                                                                                                                                                                                                                                                                                                                                                                                                                                                                                                                                                                                                                                 |
| zf-AD         | 'CX(2)CX(45)CX(2)C'                                                                                                                                                                                                                                                                                                                                                                                                                                                                                                                                                                                                                                           |
| zf-AN1        | 'CX(1)CX(13)HX(1)C', 'CX(17)CX(2)C', 'CX(2)C', 'CX(2)CX(13)HX(1)C', 'CX(2)CX(17)CX(2)H',<br>'CX(2)CX(18)CX(2)H', 'CX(2)CX(20)CX(2)H', 'CX(2)CX(26)CX(2)C', 'CX(4)CX(17)CX(2)H'                                                                                                                                                                                                                                                                                                                                                                                                                                                                                |
| zf-BED        | 'CX(2)CX(15)HX(4)H', 'CX(2)CX(19)HX(4)H'                                                                                                                                                                                                                                                                                                                                                                                                                                                                                                                                                                                                                      |
| zf-B_box      | 'CX(2)CX(12)HX(2)H', 'CX(2)CX(13)HX(2)C', 'CX(2)DX(11)HX(4)H', 'CX(2)DX(12)HX(2)H',<br>'CX(2)DX(13)HX(2)H', 'CX(2)HX(15)CX(2)C', 'CX(2)HX(16)CX(2)C', 'CX(2)HX(18)CX(5)H'                                                                                                                                                                                                                                                                                                                                                                                                                                                                                     |
| zf-C2H2       | 'CX(2)CX(11)H', 'CX(2)CX(12)HX(3)C', 'CX(2)CX(12)HX(3)H', 'CX(2)CX(12)HX(4)H',<br>'CX(2)CX(12)HX(5)H', 'CX(3)C', 'CX(3)H', 'CX(4)C', 'CX(4)CX(12)HX(3)H', 'CX(4)CX(12)HX(4)H',<br>'CX(4)CX(15)HX(3)H', 'CX(5)CX(12)HX(4)H'                                                                                                                                                                                                                                                                                                                                                                                                                                    |
| zf-C2HC       | 'CX(4)CX(12)HX(5)C', 'CX(5)C'                                                                                                                                                                                                                                                                                                                                                                                                                                                                                                                                                                                                                                 |
| zf-C2HC5      | No pattern                                                                                                                                                                                                                                                                                                                                                                                                                                                                                                                                                                                                                                                    |
| zf-C3H1       | No pattern                                                                                                                                                                                                                                                                                                                                                                                                                                                                                                                                                                                                                                                    |
| zf-C3HC       | No pattern                                                                                                                                                                                                                                                                                                                                                                                                                                                                                                                                                                                                                                                    |
| zf-C3HC4      | 'CX(0)CX(20)CX(2)C', 'CX(1)CX(23)CX(2)C', 'CX(1)CX(24)CX(4)C', 'CX(1)H',<br>'CX(1)HX(13)CX(2)C', 'CX(1)HX(16)CX(2)C', 'CX(1)HX(17)CX(2)C', 'CX(1)HX(17)CX(2)D',<br>'CX(1)HX(19)CX(2)C', 'CX(1)HX(21)CX(2)C', 'CX(1)HX(22)CX(2)C', 'CX(1)HX(23)CX(2)C',<br>'CX(2)C', 'CX(2)CX(15)CX(2)C', 'CX(2)CX(16)CX(2)C', 'CX(2)CX(17)CX(2)C',<br>'CX(2)CX(17)HX(2)C', 'CX(2)CX(19)CX(2)C', 'CX(2)CX(19)HX(2)C', 'CX(2)CX(20)CX(2)C',<br>'CX(2)CX(20)HX(2)C', 'CX(2)CX(21)CX(2)C', 'CX(2)CX(21)HX(2)C', 'CX(2)CX(22)CX(2)C',<br>'CX(2)CX(23)CX(2)C', 'CX(2)CX(23)HX(2)C', 'CX(2)CX(31)HX(2)C', 'CX(2)CX(34)HX(2)C',<br>'CX(2)CX(8)CX(13)C', 'CX(2)H', 'CX(5)HX(21)CX(5)C' |
| zf-C4         | 'CX(13)CX(2)C', 'CX(2)C', 'CX(2)CX(13)CX(2)C', 'CX(3)CX(9)CX(2)C', 'CX(5)CX(9)CX(2)C'                                                                                                                                                                                                                                                                                                                                                                                                                                                                                                                                                                         |
| zf-C4H2       | No pattern                                                                                                                                                                                                                                                                                                                                                                                                                                                                                                                                                                                                                                                    |
| zf-C4_ClpX    | 'CX(2)C'                                                                                                                                                                                                                                                                                                                                                                                                                                                                                                                                                                                                                                                      |
| zf-C4_Topoiso | No pattern                                                                                                                                                                                                                                                                                                                                                                                                                                                                                                                                                                                                                                                    |
| zf-C5HC2      | No pattern                                                                                                                                                                                                                                                                                                                                                                                                                                                                                                                                                                                                                                                    |
| zf-CCCH       | 'CX(7)CX(4)CX(3)H', 'CX(7)CX(5)CX(3)H', 'CX(8)CX(4)CX(3)H', 'CX(8)CX(5)CX(3)H'                                                                                                                                                                                                                                                                                                                                                                                                                                                                                                                                                                                |
| zf-CCHC       | 'CX(2)CX(4)HX(4)C'                                                                                                                                                                                                                                                                                                                                                                                                                                                                                                                                                                                                                                            |
| zf-CCHH       | No pattern                                                                                                                                                                                                                                                                                                                                                                                                                                                                                                                                                                                                                                                    |



|                |                                                                                                                       |
|----------------|-----------------------------------------------------------------------------------------------------------------------|
| zf-CHC2        | 'CX(2)HX(17)CX(2)C'                                                                                                   |
| zf-CHCC        | No pattern                                                                                                            |
| zf-CHY         | 'CX(0)CX(9)HX(5)H', 'CX(1)HX(17)CX(2)C', 'CX(1)NX(0)CX(9)CX(1)EX(0)C', 'CX(2)C',<br>'CX(2)CX(9)CX(2)C'                |
| zf-CSL         | 'CX(1)CX(19)CX(2)C'                                                                                                   |
| zf-CW          | 'CX(4)CX(20)CX(10)C'                                                                                                  |
| zf-CXXC        | 'CX(2)CX(2)CX(15)C', 'CX(2)CX(2)CX(32)C'                                                                              |
| zf-DBF         | No pattern                                                                                                            |
| zf-DHHC        | No pattern                                                                                                            |
| zf-DNA_Pol     | No pattern                                                                                                            |
| zf-DNL         | 'CX(2)CX(21)CX(2)C'                                                                                                   |
| zf-Dof         | No pattern                                                                                                            |
| zf-FCS         | No pattern                                                                                                            |
| zf-FPG_IleRS   | 'CX(19)CX(2)C', 'CX(2)CX(16)CX(2)C'                                                                                   |
| zf-GRF         | No pattern                                                                                                            |
| zf-H2C2        | No pattern                                                                                                            |
| zf-HIT         | 'CX(2)C', 'CX(2)CX(15)CX(3)C', 'CX(2)CX(19)CX(3)C'                                                                    |
| zf-HYPF        | No pattern                                                                                                            |
| zf-LITAF-like  | No pattern                                                                                                            |
| zf-LSD1        | No pattern                                                                                                            |
| zf-LYAR        | 'CX(2)CX(11)HX(2)C'                                                                                                   |
| zf-MIZ         | 'CX(1)HX(17)CX(2)C', 'CX(1)HX(19)CX(2)C', 'CX(1)HX(22)CX(2)C', 'CX(2)C',<br>'CX(2)CX(16)CX(2)C', 'CX(2)CX(17)CX(2)C'  |
| zf-MYND        | 'CX(17)CX(3)H', 'CX(2)CX(12)HX(3)C', 'CX(2)CX(15)CX(3)C', 'CX(2)CX(16)CX(3)C',<br>'CX(2)CX(17)HX(3)C', 'CX(3)C'       |
| zf-NADH-PPase  | 'CX(2)C', 'CX(2)CX(14)CX(2)C', 'CX(2)CX(3)H'                                                                          |
| zf-NF-X1       | No pattern                                                                                                            |
| zf-NPL4        | No pattern                                                                                                            |
| zf-P11         | No pattern                                                                                                            |
| zf-PARP        | 'CX(2)CX(28)HX(2)C', 'CX(2)CX(30)HX(2)C'                                                                              |
| zf-RAG1        | No pattern                                                                                                            |
| zf-RING-like   | 'CX(2)CX(17)HX(2)C', 'CX(2)CX(20)CX(2)C'                                                                              |
| zf-RNPHF       | No pattern                                                                                                            |
| zf-RanBP       | 'CX(2)CX(10)CX(2)C', 'CX(4)CX(10)CX(2)C'                                                                              |
| zf-Sec23_Sec24 | 'CX(17)CX(2)C', 'CX(18)CX(2)C', 'CX(2)C', 'CX(4)CX(18)CX(2)C'                                                         |
| zf-TAZ         | 'HX(3)CX(12)CX(4)C', 'HX(3)CX(4)CX(2)C', 'HX(3)CX(4)CX(4)C', 'HX(3)CX(5)CX(4)C',<br>'HX(3)CX(7)CX(2)C'                |
| zf-TRAF        | 'CX(2)CX(11)H', 'CX(3)C', 'CX(3)CX(11)HX(3)C', 'CX(3)CX(11)HX(4)C', 'CX(3)CX(12)HX(4)C',<br>'CX(6)CX(11)H', 'HX(15)C' |

|              |                                                                                                                                 |
|--------------|---------------------------------------------------------------------------------------------------------------------------------|
| zf-Tim10_DDP | No pattern                                                                                                                      |
| zf-U1        | 'CX(2)CX(14)HX(5)H'                                                                                                             |
| zf-UBP       | 'CX(12)C', 'CX(16)CX(6)C', 'CX(19)CX(6)C', 'CX(2)CX(15)HX(5)H', 'CX(2)CX(16)HX(8)H',<br>'CX(2)H', 'CX(4)CX(15)HX(5)H', 'CX(7)C' |
| zf-UBR       | No pattern                                                                                                                      |
| zf-XS        | No pattern                                                                                                                      |
| zf-ZPR1      | 'CX(2)C'                                                                                                                        |
| zf-dskA_traR | 'CX(2)CX(17)CX(2)C'                                                                                                             |
| zf-nanos     | No pattern                                                                                                                      |
| zf-piccolo   | No pattern                                                                                                                      |
| zf-primase   | No pattern                                                                                                                      |
